# Supplementary material
Source: bioRxiv or medRxiv preprint supplement (https://www.biorxiv.org/highwire/filestream/92959/field_highwire_adjunct_files/8/302307-7.pdf)
Supplement: Supplementary file [file 302307-7.pdf]

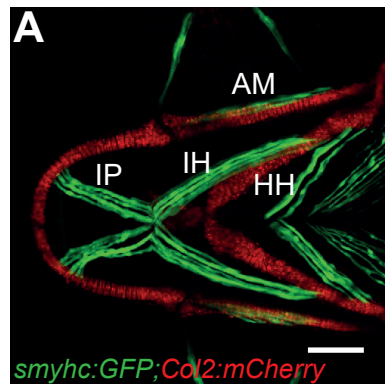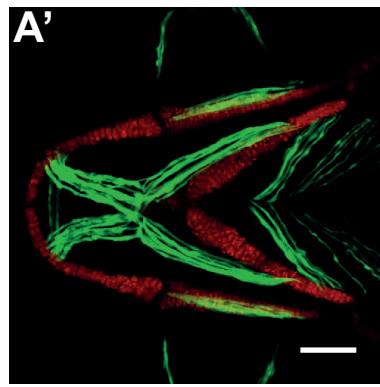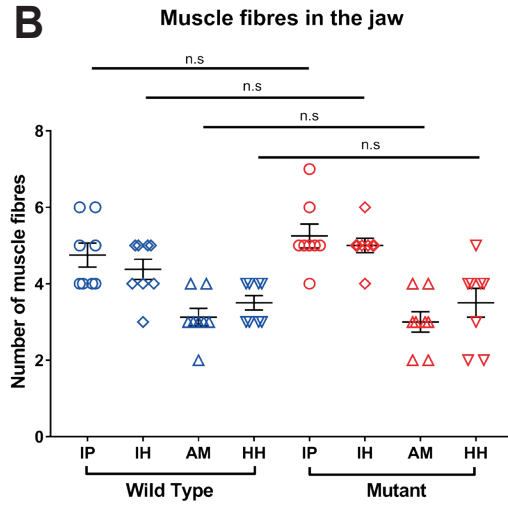

**Supplementary Figure 7: Mutation of *col11a2* does not alter muscle fibre number at 5dpf.** (A,A') *smyhc:GFP;Col2a1:mCherry* transgenic line shows slow myosin in muscle (green) and type II collagen cartilage (red) in wild type and *col11a2* mutant zebrafish at 5dpf. (B) Quantification of muscle fibre number in four muscles in the jaw in wild type and *col11a2* mutant zebrafish (n= 5 and 8 respectively). Locations of muscles are labelled and shown in (A) IP= Intermandibularis posterior, IH= Interhyoideus, AM= Adductor mandibulae and HH= hyohyoideus. Student's unpaired t-tests were performed for B, data is mean with SEM. Scale
